# Supplementary material for: Ultrasonic-assisted rational design of uniform rhombus-shaped ZnMoOx on graphene for advanced sunlight-driven photocatalysts, functional supercapacitor electrodes, and antibacterial platforms
Source: Royal Society of Chemistry journal article supplement (doi:10.1039/c4ra11770k), 2014-01-01
Supplement: c4ra11770k1.pdf [file c4ra11770k1.pdf]

## Electronic Supplementary Information

### Ultrasonic-Assisted Rational Design of Uniform Rhombus-Shaped ZnMoO<sub>x</sub> on Graphene for Advanced Sunlight-Driven Photocatalysts, Functionable Supercapacitor Electrodes, and Antibacterial Platforms

*Shuying Dong<sup>‡a</sup>, Limin Hu<sup>‡a</sup>, Jinglan Feng<sup>a</sup>, Yunqing Pi<sup>a</sup>, Qilu Li<sup>a</sup>, Yukun Li<sup>a</sup>, Menglin Liu<sup>a</sup>,  
Jingyu Sun<sup>b1</sup>, and Jianhui Sun<sup>a2</sup>*

*<sup>a</sup> School of Environment, Henan Normal University, Key Laboratory for Yellow River and Huai River Water Environmental and Pollution Control, Ministry of Education, Henan Key Laboratory for Environmental Pollution Control, Xinxiang, Henan 453007, P. R. China*

*<sup>b</sup> Center for Nanochemistry (CNC), Beijing National Laboratory for Molecular Sciences, College of Chemistry and Molecular Engineering, Peking University, Beijing 100871, P. R. China*

*‡ These authors contributed equally.*

<sup>1</sup> Corresponding author. E-mail: sunjy-cnc@pku.edu.cn (J. Y. Sun).

<sup>2</sup> Corresponding author. E-mail: sunjh@htu.cn (J. H. Sun).

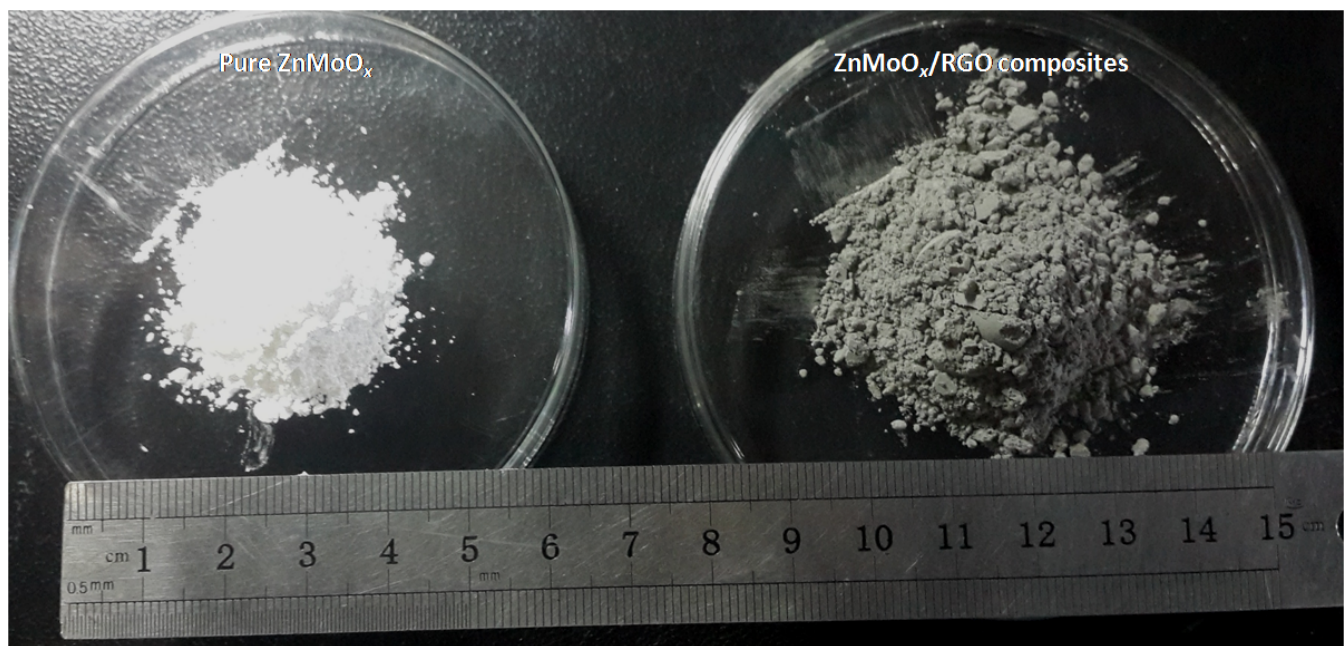

**Figure S1. Photograph showing the appearance of pure ZnMoO<sub>x</sub> (MG-0) and ZnMoO<sub>x</sub>/RGO composites (MG-3).**

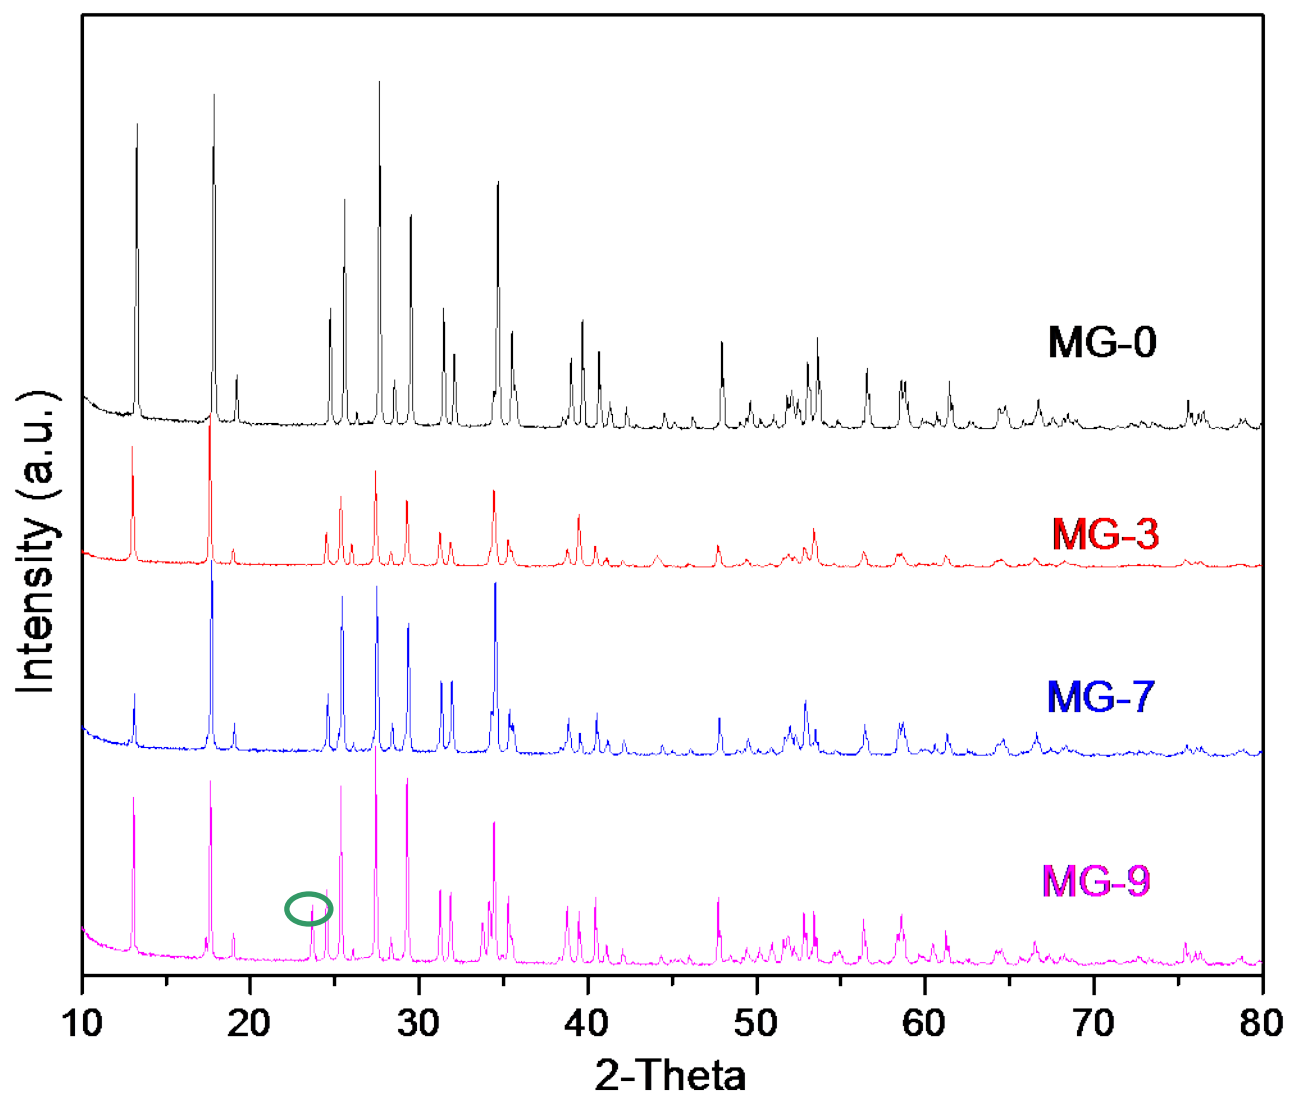

**Figure S2. Comparison of the XRD spectra of the as-synthesized pure  $\text{ZnMoO}_x$  and  $\text{ZnMoO}_x/\text{RGO}$  composites with different RGO loadings.**

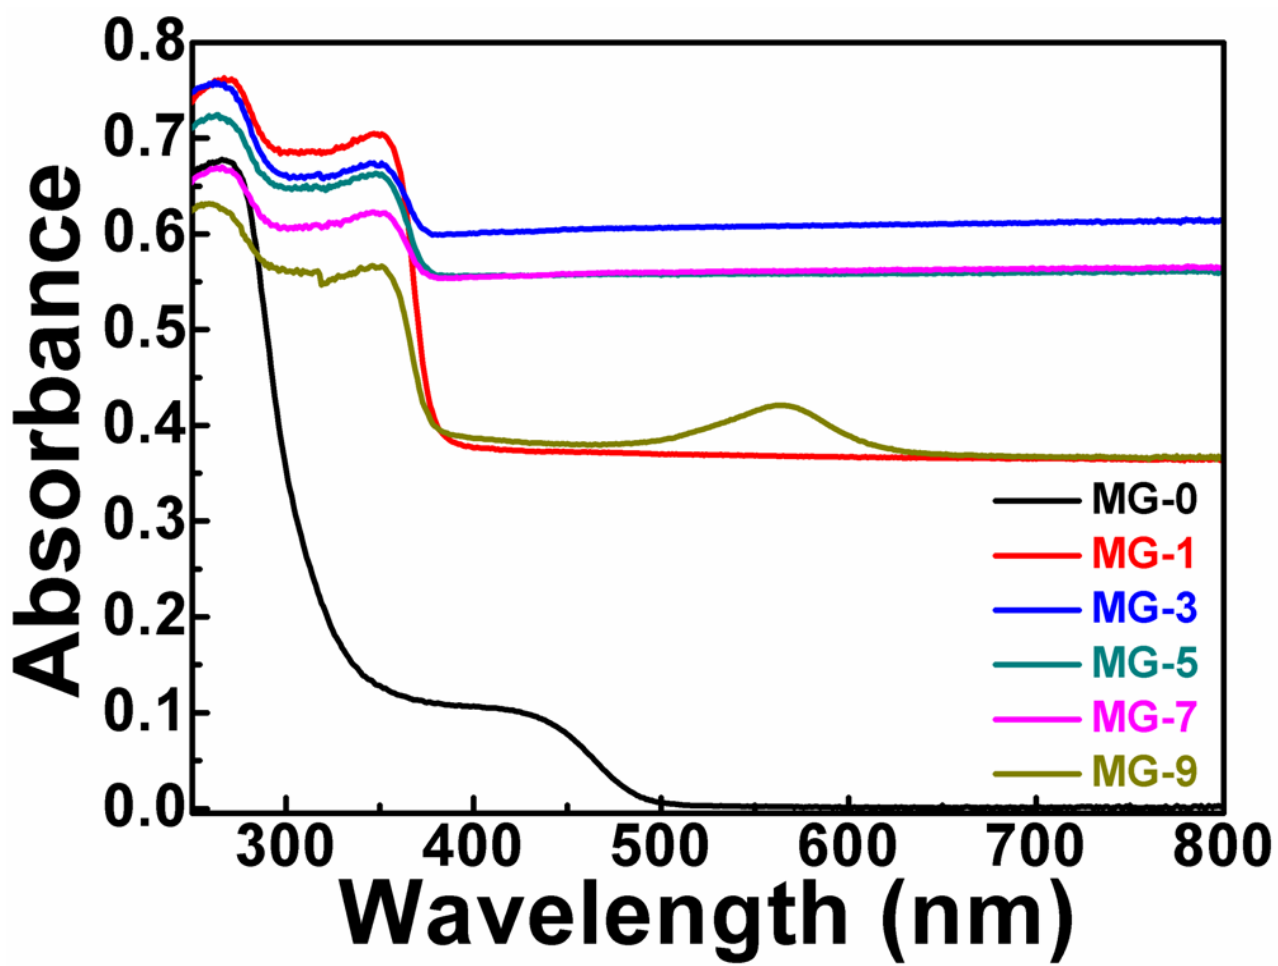

Figure S3. Comparison of the UV-vis DR spectra of the as-synthesized pure ZnMoO<sub>x</sub> and ZnMoO<sub>x</sub>/RGO composites with different RGO loadings.

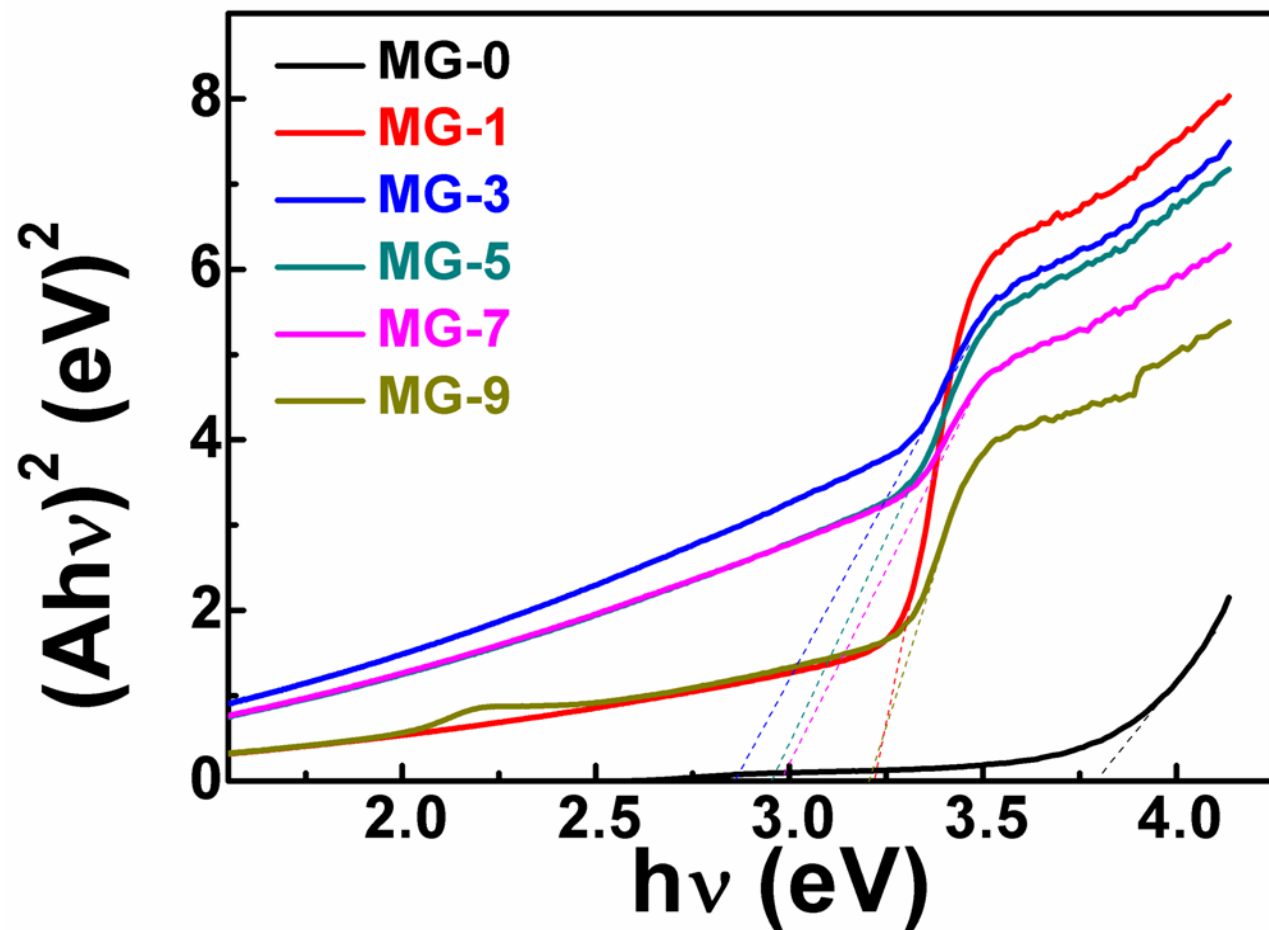

Figure S4. Comparison of the relationship between  $(Ah\nu)^2$  and the photon energy ( $h\nu$ ) of the as-synthesized pure  $\text{ZnMoO}_x$  and  $\text{ZnMoO}_x/\text{RGO}$  composites with different RGO loadings.

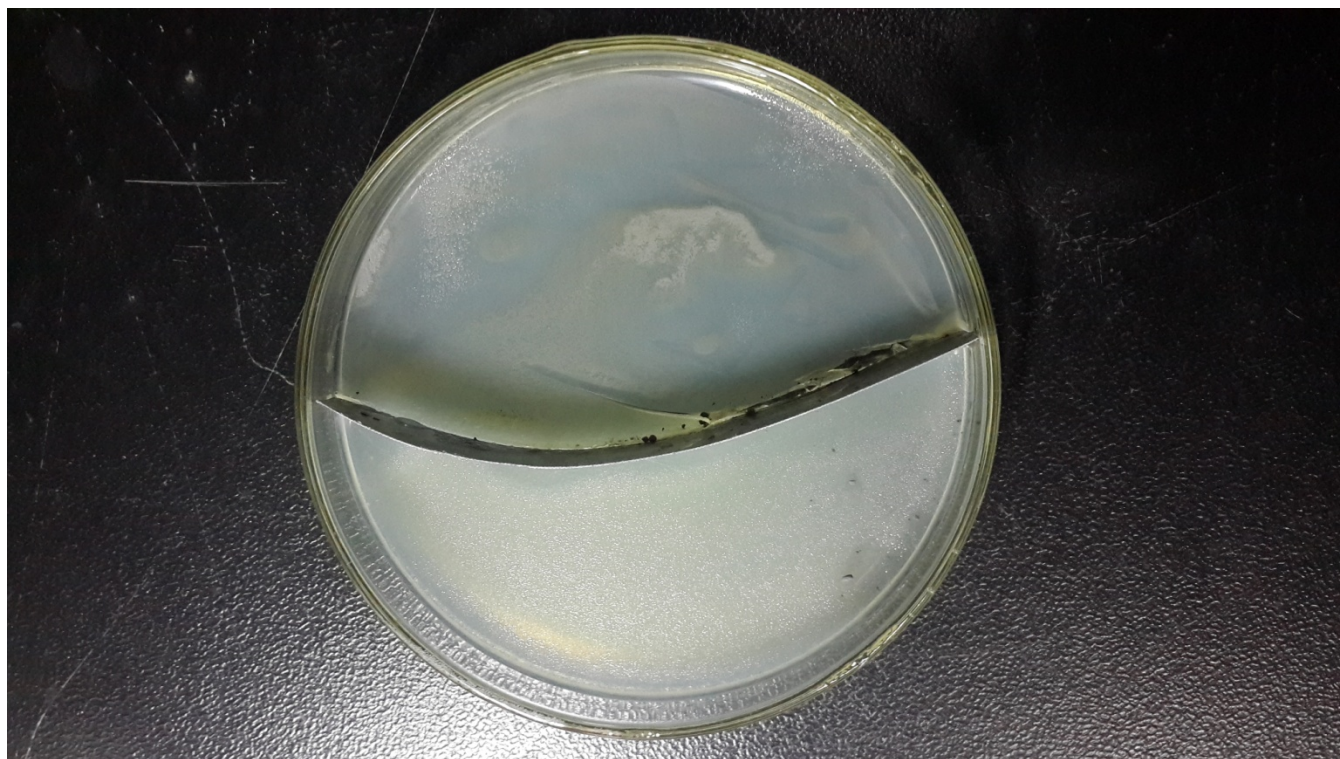

**Figure S5. Photograph showing the appearance of *E. Coli* growth at the separated MG-0 (bottom) and MG-3 (top) samples.**
